# Supplementary material for: A direct assay of butyrylcholinesterase activity using a fluorescent substrate
Source: Royal Society of Chemistry journal article supplement (doi:10.1039/c6ob01360k), 2016-01-01
Supplement: c6ob01360k1.pdf [file c6ob01360k1.pdf]

## **Electronic Supplementary Information (ESI)**

# **Direct assay of butyrylcholinesterase activity using a fluorescent substrate**

Seungyoon Kang,<sup>‡</sup> Suji Lee<sup>‡</sup>, Woojin Yang, Jiwon Seo and Min Su Han\*

Department of Chemistry, Gwangju Institute of Science and Technology, 123 Cheomdangwagi-ro,  
Buk-gu, Gwangju 61005, Republic of Korea

E-mail: happyhan@gist.ac.kr; Fax: +82-62-715-2866; Tel: +82-62-715-2848

### Stability test of 1 in buffer condition

Fluorescence spectra of **1** (50  $\mu\text{M}$ ) was recorded under different pH conditions (pH = 7.0, 7.4, 8.0) using Tris buffer (20 mM) for 1 h to find the appropriate conditions for enzymatic assay.

In all experiments, the final sample volume was 1 mL and all measurements were performed in 1 cm quartz cells at 25  $^{\circ}\text{C}$  with excitation at 355 nm.

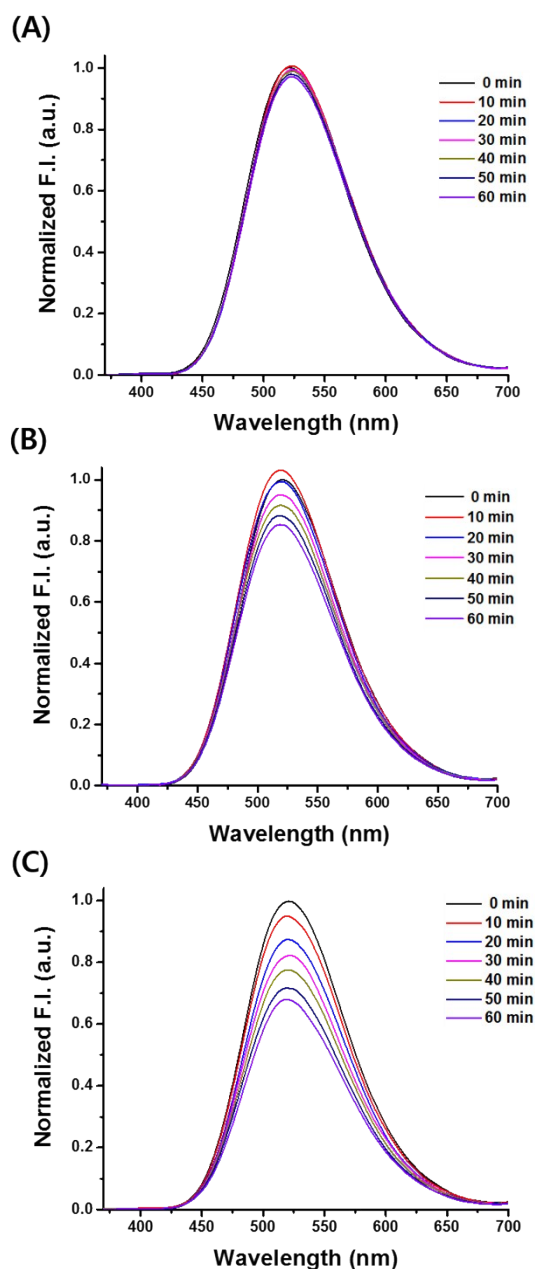

**Figure S1.** Stability test of **1** (50  $\mu\text{M}$ , Tris buffer 20 mM) in different pH condition (A) pH 7.0, (B) pH 7.4, (C) pH 8.0.  $\lambda_{\text{ex}} = 355 \text{ nm}$ .

## Mechanism studies of BChE assay based on **1**

BChE (2 U/mL) was then added to the sample containing **1** (100  $\mu$ M) and Tris buffer (20 mM, pH 7.0) and the mixture was incubated for 90 min. By mass spectroscopy, the fragment formed by the enzymatic hydrolysis of **1** was confirmed.

A sample containing **1** (50  $\mu$ M) and Tris buffer (20 mM, pH 7.0) in distilled H<sub>2</sub>O and another sample containing **3** (50  $\mu$ M) and Tris buffer (20 mM, pH 7.0) in 1% DMSO were prepared. Then, the fluorescence spectrum of each sample was recorded.

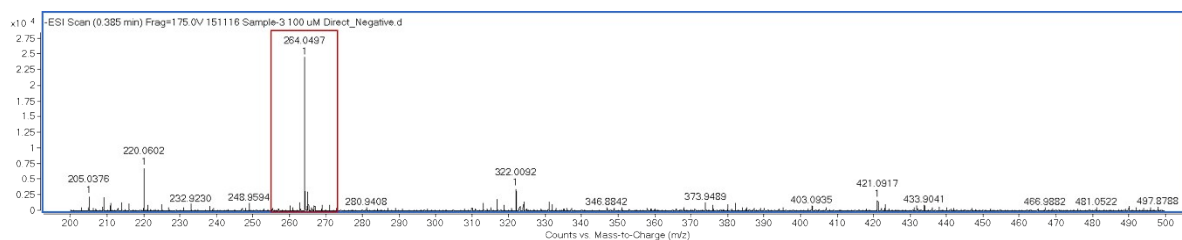

**Figure S2.** Mass spectrum of **1** (100  $\mu$ M, Tris buffer pH 7.0 20 mM) containing BChE (2 U/mL) after incubation for 2 hours.

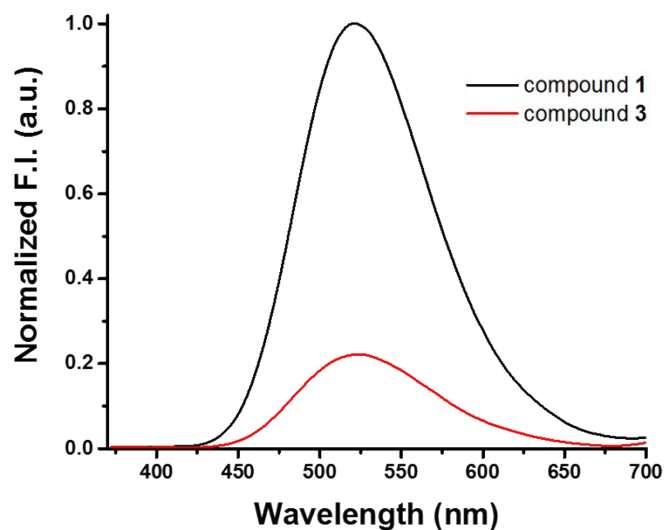

**Figure S3.** Comparison of fluorescence property of **1** (50  $\mu$ M, Tris buffer pH 7.0 20 mM) and **3** (50  $\mu$ M, Tris buffer pH 7.0 20 mM).  $\lambda_{\text{ex}} = 355$  nm.

## Selectivity test of **1** for BChE

BChE and other esterase were used; carboxylesterase from porcine liver (CES, EC 3.1.1.1), lipase from porcine pancreas (EC 3.1.1.3), and phospholipase C from *Clostridium perfringens* (PLC, EC 3.1.4.3). Each of esterase (2 U/mL) was added to the sample containing **1** (50  $\mu$ M) and Tris buffer (20 mM, pH 7.0), and fluorescence spectra of each sample were recorded for 30 min.

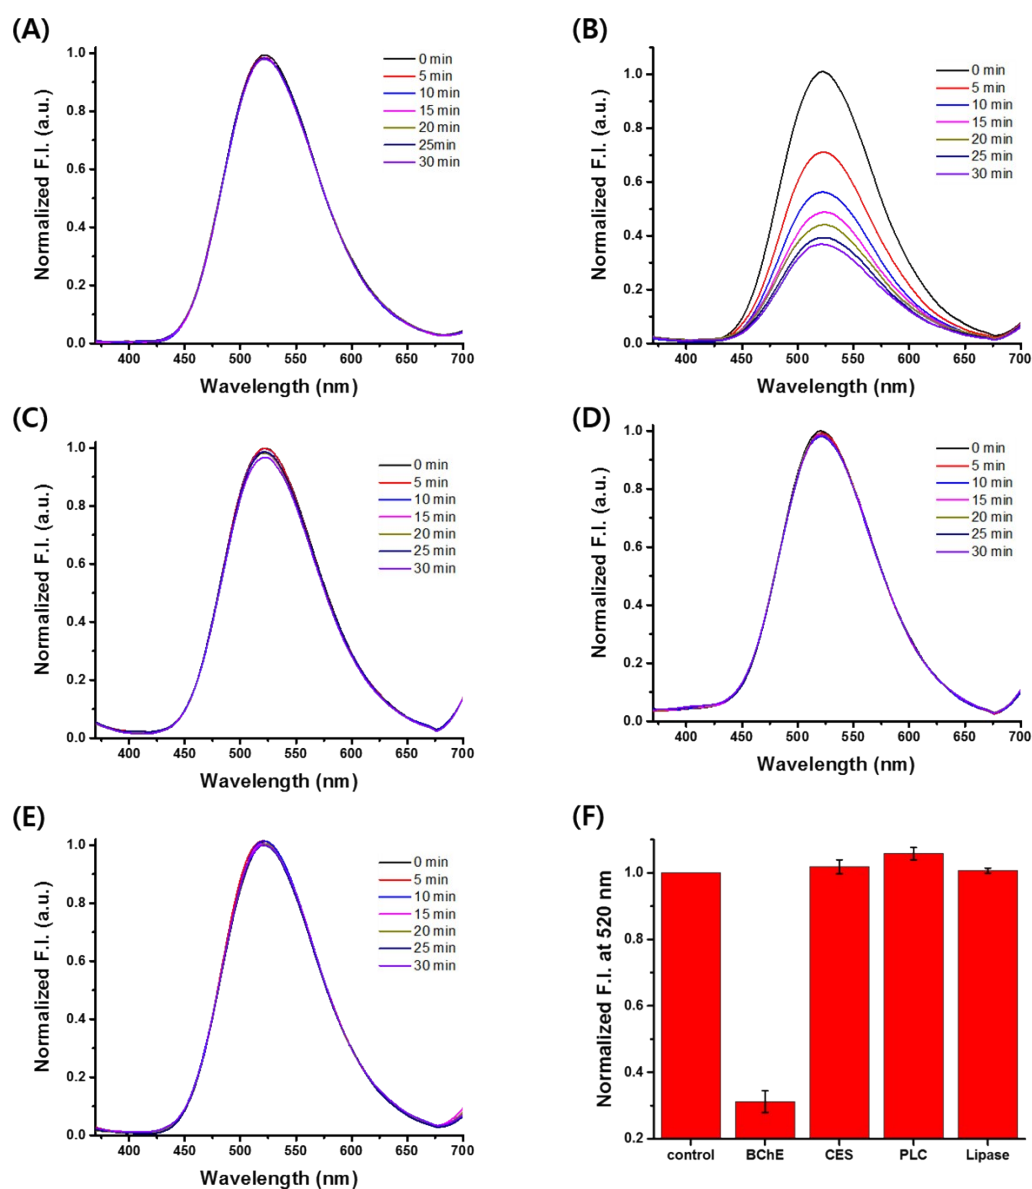

**Figure S4.** Fluorescence spectra of **1** (50  $\mu$ M, Tris buffer 20 mM) with different esterase (2 U/mL), (A) without esterase, (B) BChE, (C) CES, (D) PLC, (E) lipase, (F) Normalized fluorescence intensities at 520 nm of **1** versus different esterase (2 U/mL) after 30 min incubation.  $\lambda_{\text{ex}} = 355$  nm.

## Model study of 3,6-dihydroxy phthalimide derivatives

In order to confirm the substitution effect from dimethoxy phthalimide part to dihydroxy phthalimide in compound **1**, we synthesized 3,6-dihydroxy phthalimide derivative (**S1**, **S2**) for comparison study (Scheme S1).

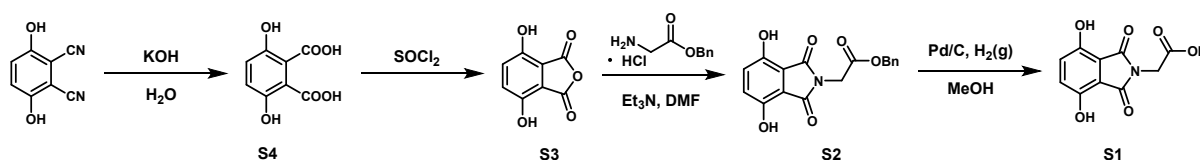

**Scheme S1.** Synthesis of 3,6-dihydroxy phthalimide derivatives (**S1**, **S2**) for model study.

- 1) Synthesis of 3,6-dihydroxyphthalic acid (**S4**) and 4,7-dihydroxyisobenzofuran-1,3-dione (**S3**).

**S4** and **S3** was synthesized by following literature procedures. (*Phys. Chem. Chem. Phys.*, 2015, **17**, 30659-30669.)

- 2) Synthesis of benzyl 2-(4,7-dihydroxy-1,3-dioxoisindolin-2-yl)acetate (**S2**).

Et<sub>3</sub>N (0.74 mL, 5.25 mmol) and **S3** (0.90 g, 5.00 mmol) were added to a solution of Glycine benzylester hydrochloride (1.06 g, 5.25 mmol) in DMF (6 mL) at 0 °C. After stirring for 30 min, reaction mixture was heated at 70 °C for 14 h. The brown solution was cooled to r.t. and diluted with TDW (50 mL), and extracted with EtOAc (50 mL × 3). The organic phase was washed with TDW and brine and dried with anhydrous Na<sub>2</sub>SO<sub>4</sub>. The filtrate was then concentrated and residue as purified by column chromatography (silica gel, CHCl<sub>3</sub>: MeOH = 10: 1, v/v) to obtain **S2** (0.43 g, 26 %) as a pale red powder. <sup>1</sup>H NMR (400 MHz, DMSO-d<sub>6</sub>): δ 9.91 (br.s, 2H), 7.40-7.32 (m, 5H), 7.10 (s, 2H), 5.18 (s, 2H), 4.35 (s, 2H) ppm. <sup>13</sup>C NMR

(100 MHz, DMSO- $d_6$ ):  $\delta$  167.90, 165.59, 148.43, 135.58, 128.51, 128.25, 128.00, 126.32, 113.82, 66.57, 38.34 ppm.

3) Synthesis of 2-(4,7-dihydroxy-1,3-dioxoisindolin-2-yl)acetic acid (**S1**).

A solution of **S2** (0.23 g, 0.7 mmol) in MeOH (15 mL) was hydrogenated at atmospheric pressure for 30 min at room temperature using 10% palladium-carbon (0.14 g) as a catalyst. The mixture was filtered through a pad of Celite, and the filtrate was concentrated under reduced pressure to obtain **S1** (0.14 g, 84 %) as a yellow powder.  $^1\text{H}$  NMR (400 MHz, DMSO- $d_6$ ):  $\delta$  10.31 (br.s, 2H), 7.10 (s, 2H), 4.16 (s, 2H) ppm.  $^{13}\text{C}$  NMR (100 MHz, DMSO- $d_6$ ):  $\delta$  169.29, 165.78, 148.30, 126.18, 114.01, 38.38 ppm.

4) UV-Vis and Fluorescence spectra of **S1** and **S2** for various pH.

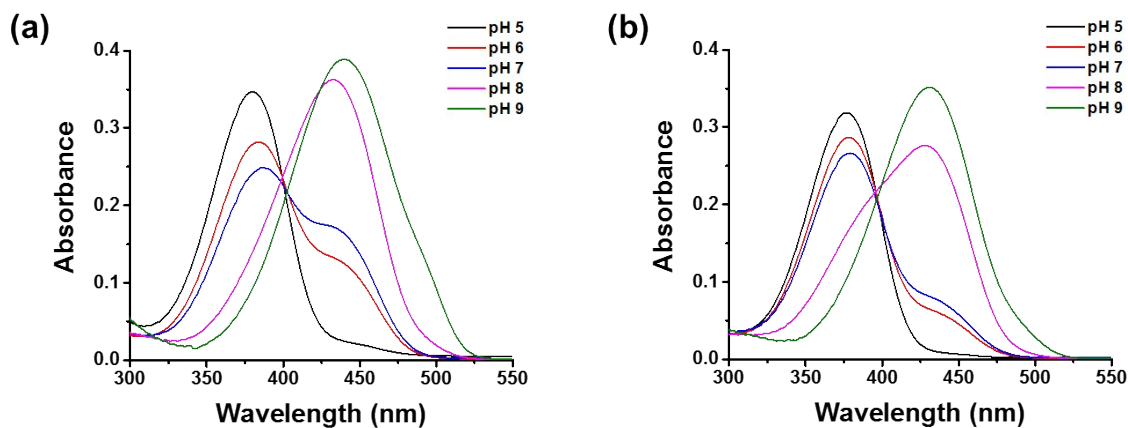

**Figure S5.** (a) UV-vis spectra of **S2** (50  $\mu\text{M}$ ) and (b) **S1** (50  $\mu\text{M}$ ) for various pH condition (20 mM, DMSO 5%). pH 5~6: citrate buffer, pH 7~9: Tris buffer.

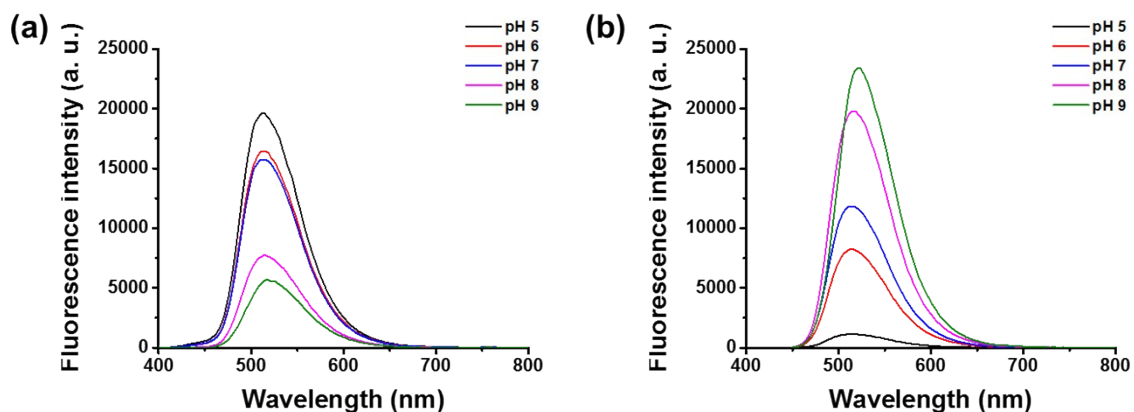

**Figure S6.** Fluorescence spectra of **S2** (50  $\mu$ M) for various pH condition (20 mM, DMSO 5%). pH 5~6: citrate buffer, pH 7~9: Tris buffer. (a)  $\lambda_{\text{ex}} = 378$  nm, (b)  $\lambda_{\text{ex}} = 436$  nm

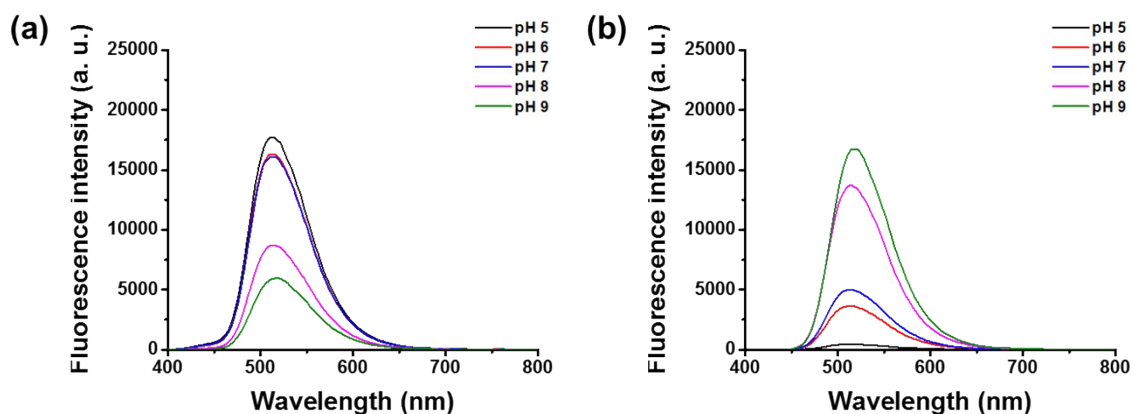

**Figure S7.** Fluorescence spectra of **S1** (50  $\mu$ M) for various pH condition (20 mM, DMSO 5%). pH 5~6: citrate buffer, pH 7~9: Tris buffer. (a)  $\lambda_{\text{ex}} = 378$  nm, (b)  $\lambda_{\text{ex}} = 436$  nm

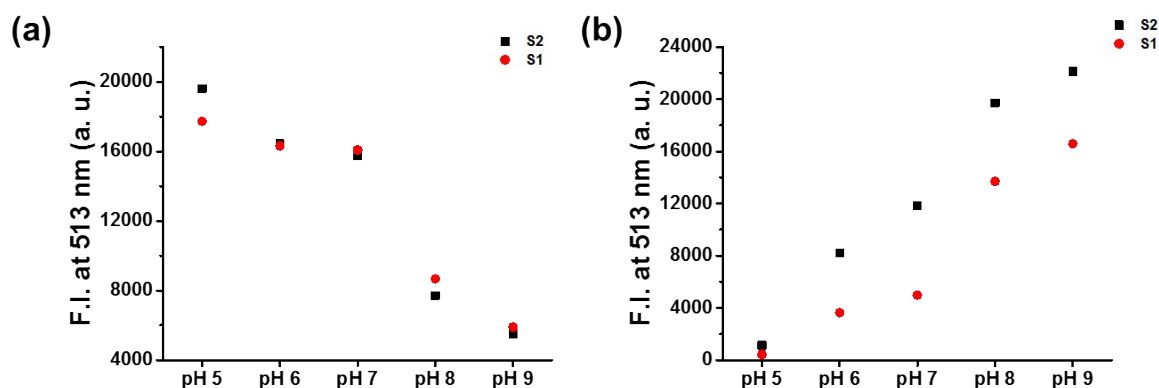

**Figure S8.** Plot of fluorescence intensity of **S2** (50  $\mu$ M) and **S1** (50  $\mu$ M) at 513 nm. pH 5~6: citrate buffer, pH 7~9: Tris buffer. (a)  $\lambda_{ex} = 378$  nm, (b)  $\lambda_{ex} = 436$  nm

Based on the UV-Vis spectra of **S1** and **S2**, we recorded fluorescence emission spectra of **S1** and **S2** for two difference excitation wavelength (378 nm, 436 nm). As shown Figure 4(a), in case of  $\lambda_{ex} = 378$  nm, fluorescence intensity of **S1** and **S2** at 513 nm are almost same in various pH condition. And in case of  $\lambda_{ex} = 436$  nm, **S2** (benzyl ester moiety) was showed more strong fluorescence intensity than **S1** (acid moiety). This experimental result is similar with that of dimethoxy moiety that fluorescence on-off phenomena.



## Characterization of compounds

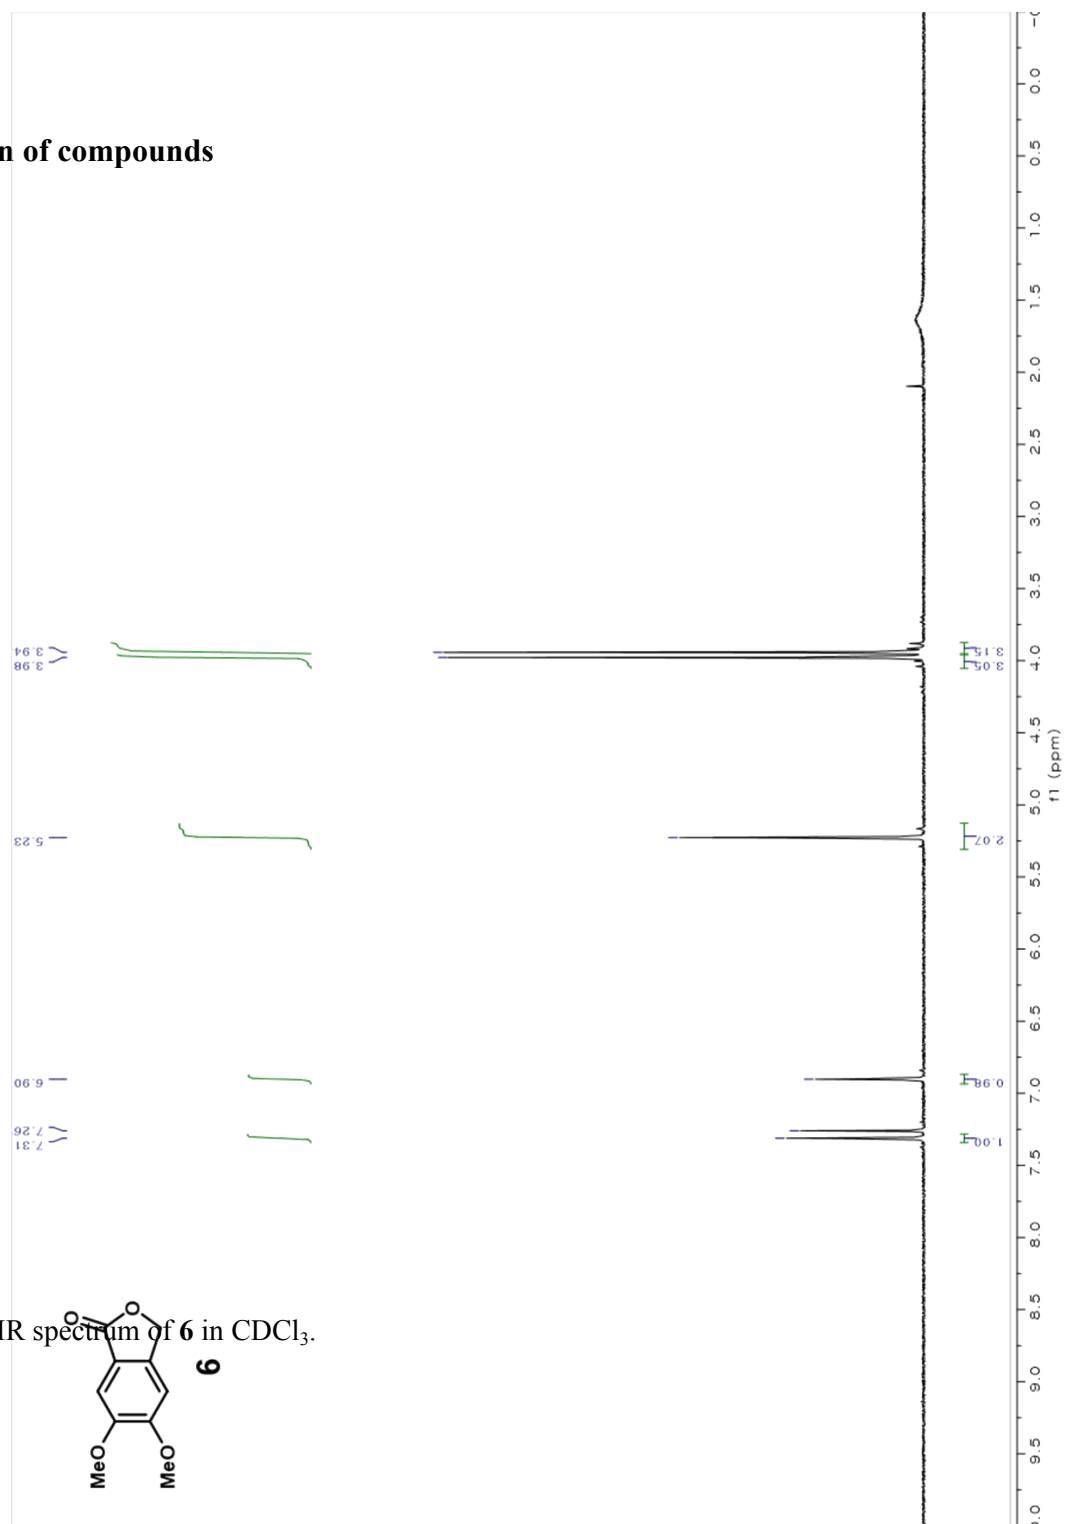

Figure S9. <sup>1</sup>H-NMR spectrum of **6** in CDCl<sub>3</sub>.

**Figure S10.** <sup>1</sup>H-NMR spectrum of **5** in DMSO-d<sub>6</sub>.

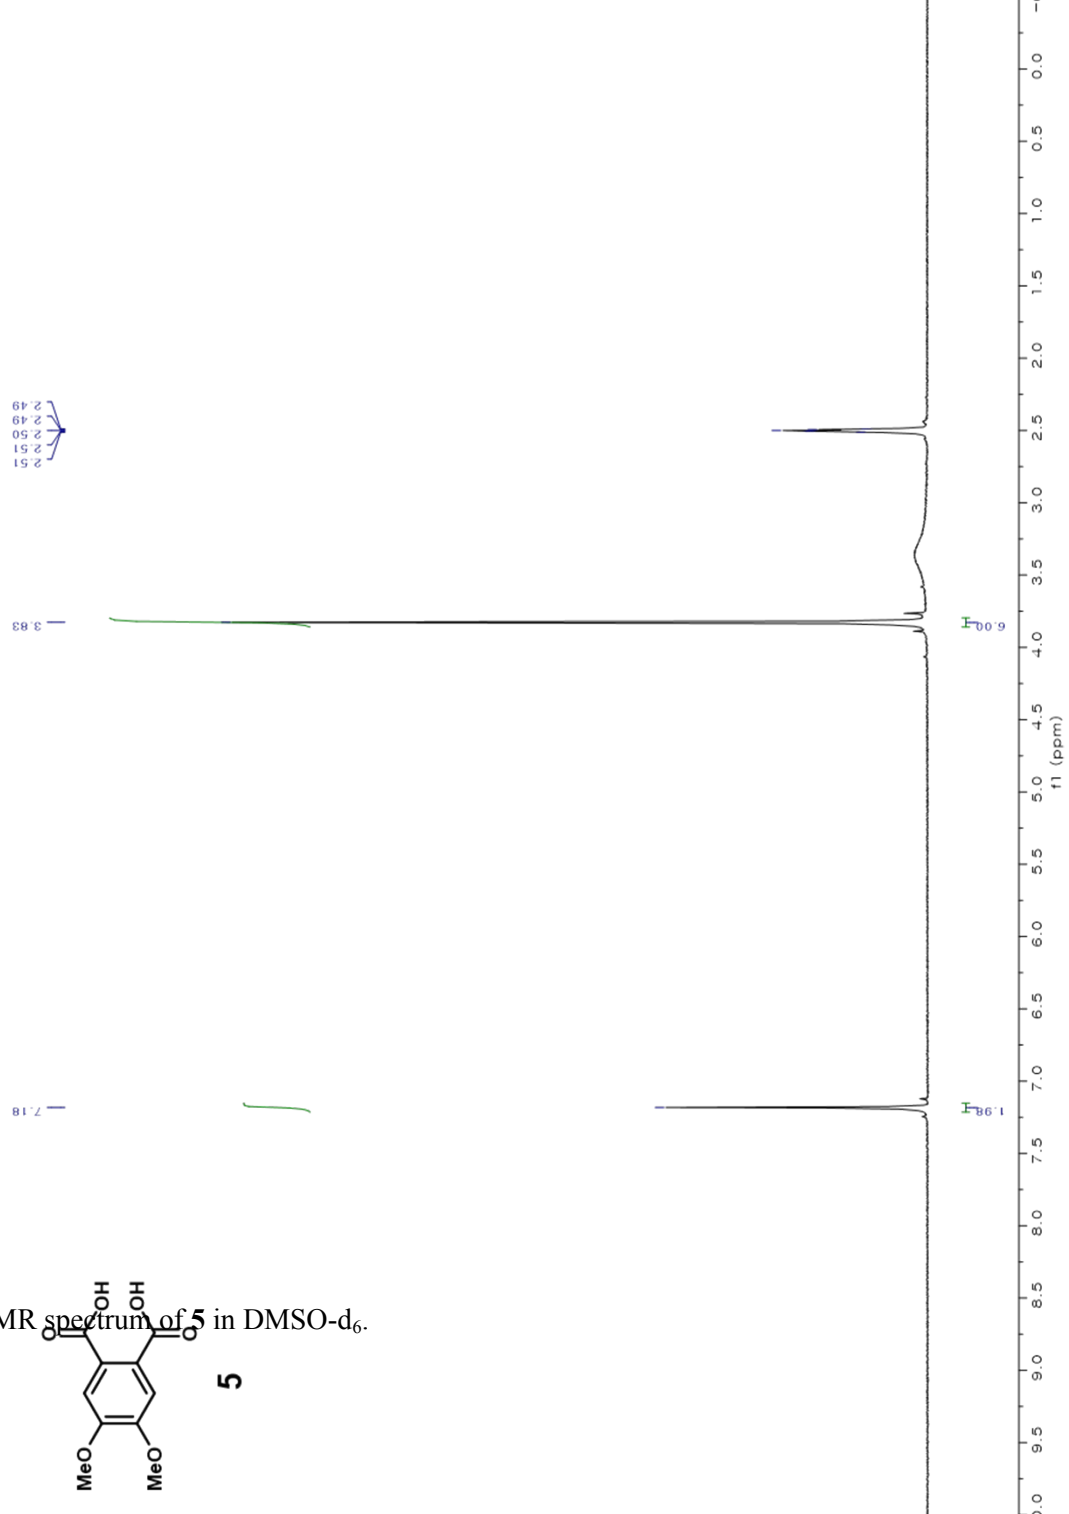

Figure S11. <sup>1</sup>H-NMR spectrum of **4** in CDCl<sub>3</sub>.

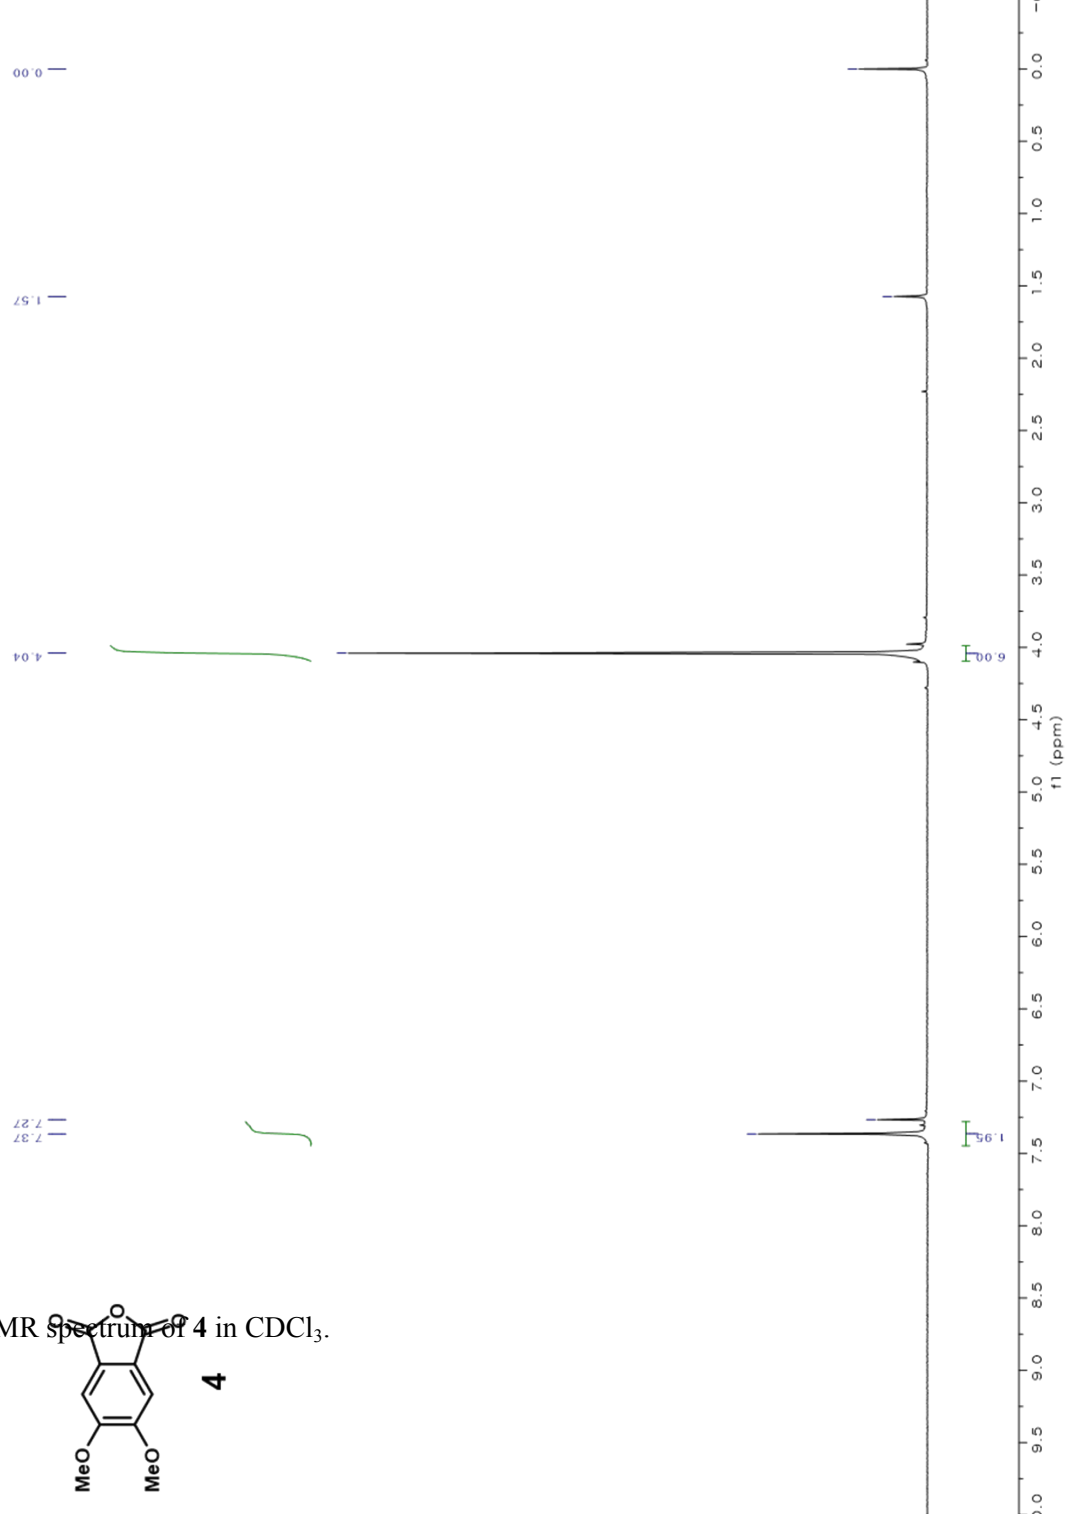

**Figure S12.**  $^1\text{H-NMR}$  spectrum of **3** in  $\text{DMSO-d}_6$ .

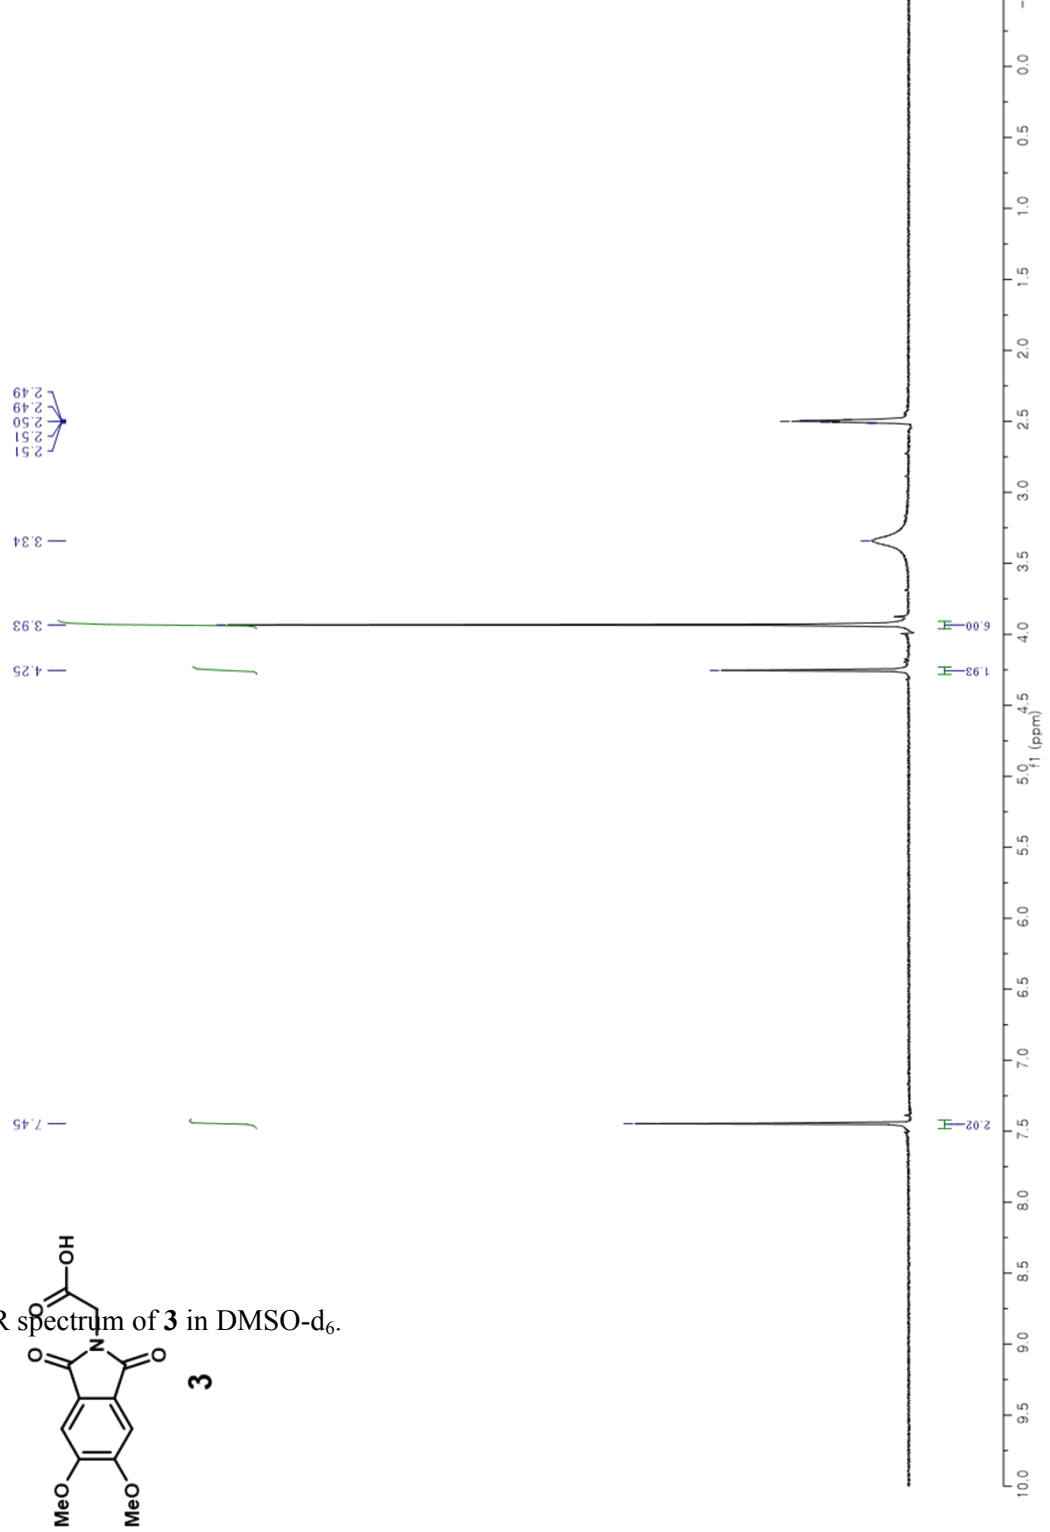

Figure S13.  $^1\text{H-NMR}$  spectrum of **2** in  $\text{CDCl}_3$ .

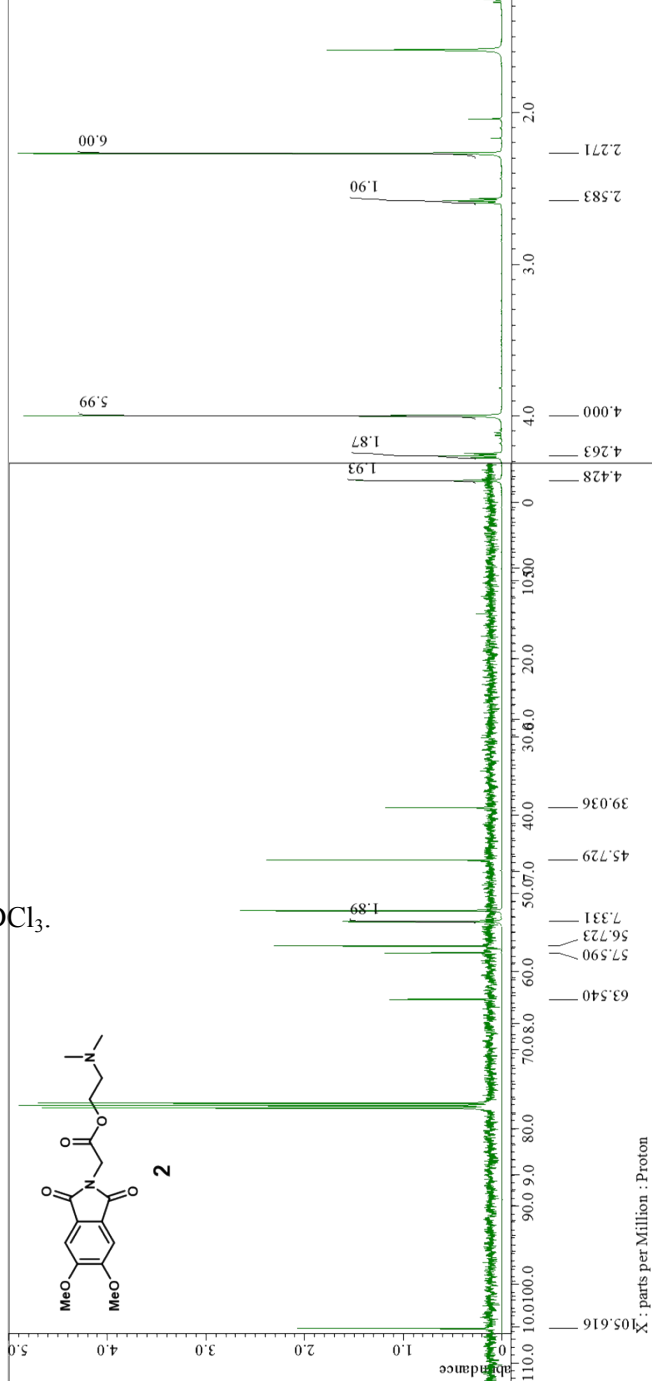

Figure S14.  $^{13}\text{C-NMR}$  spectrum of **2** in  $\text{CDCl}_3$ .

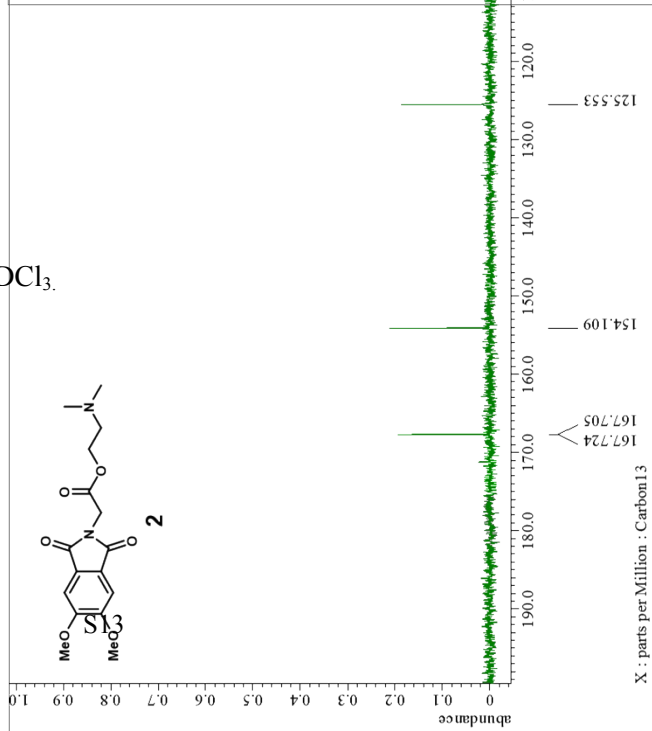

Figure S15. ESI-Mass spectrum of 2.

${}^{16}\text{H}_{20}\text{N}_2\text{O}_6$ : 33  
520  
500 510 520

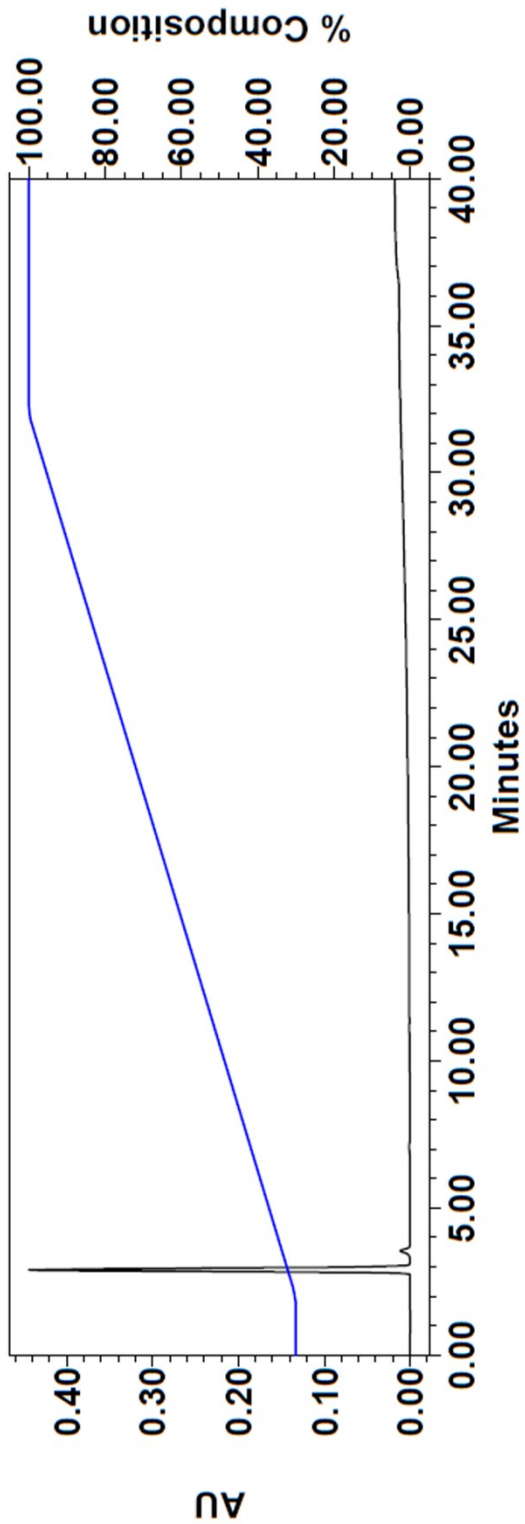

Figure S16. HPLC chromatogram of 2.

Figure S17. <sup>1</sup>H-NMR spectrum of **1** in DMSO-d<sub>6</sub>.

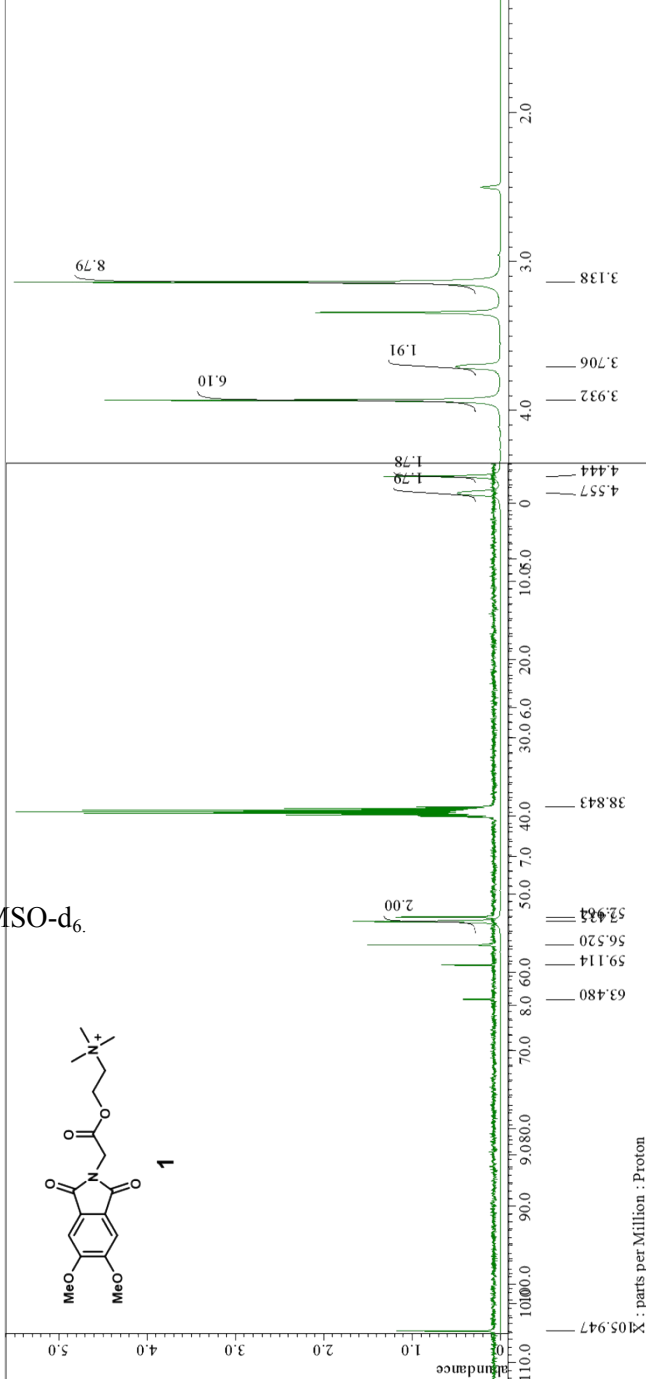

Figure S18. <sup>13</sup>C-NMR spectrum of **1** in DMSO-d<sub>6</sub>.

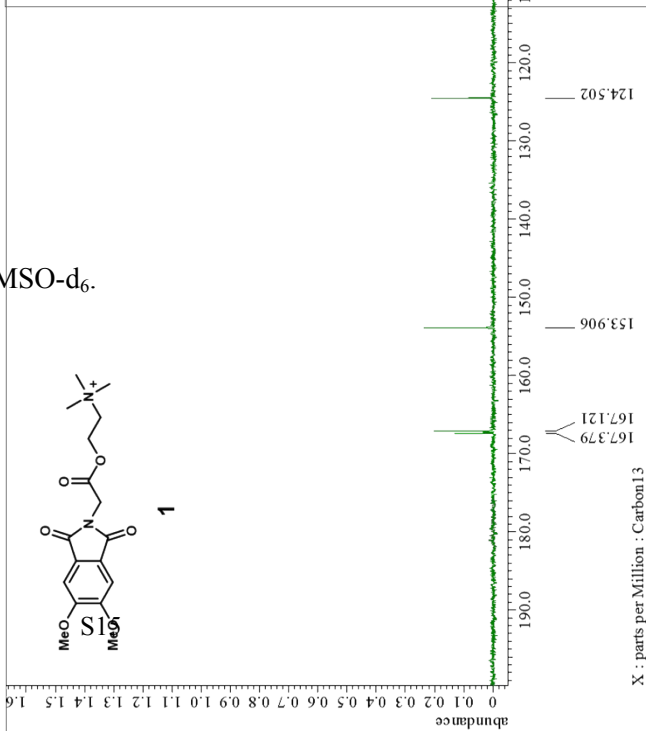

Figure S19. ESI-Mass spectrum of 1.

$^{17}\text{H}_{23}\text{N}_2\text{O}_6$   
L0482 519.04  
00 510 52

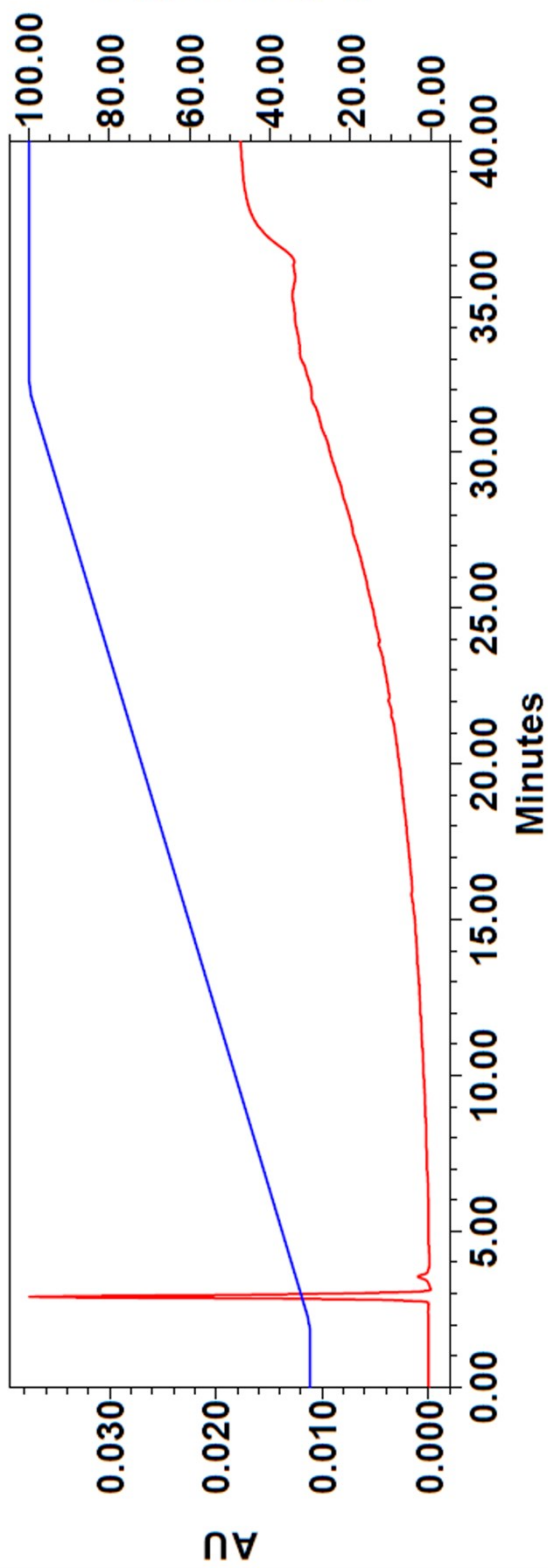

Figure S20. HPLC chromatogram of 1.



Figure S21.  $^1\text{H}$ -NMR spectrum of S2 in D

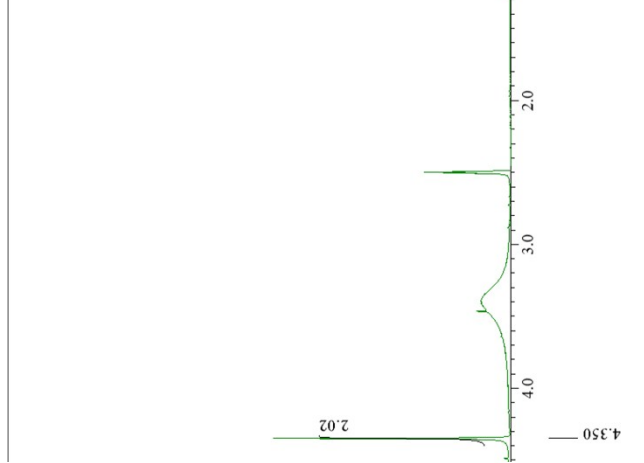

Figure S22.  $^{13}\text{C}$ -NMR spectrum of S2 in DMSO- $d_6$ .

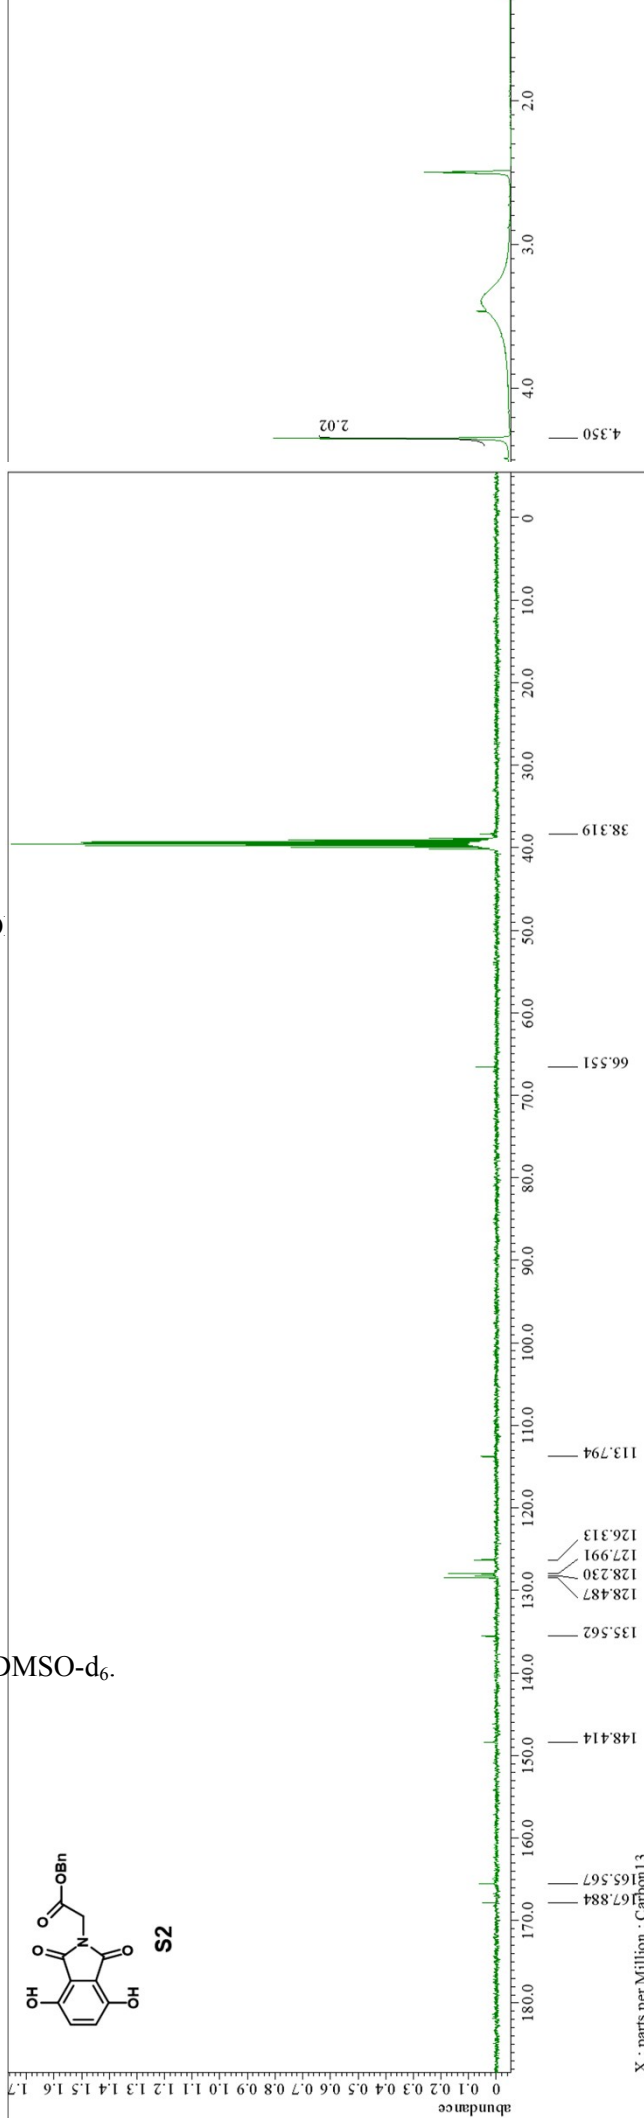

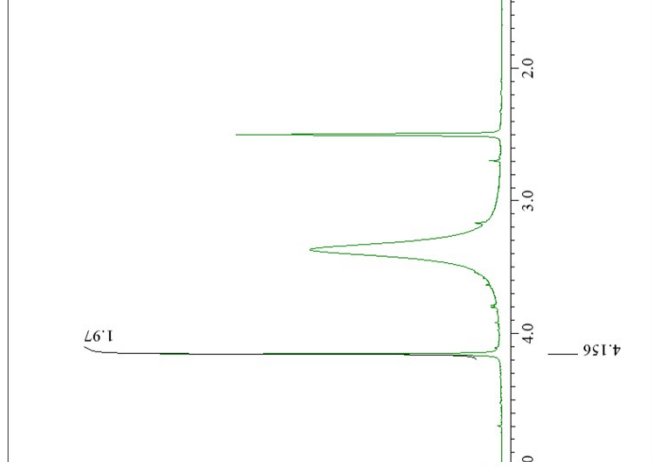

Figure S23. <sup>1</sup>H-NMR spectrum of S1 in D

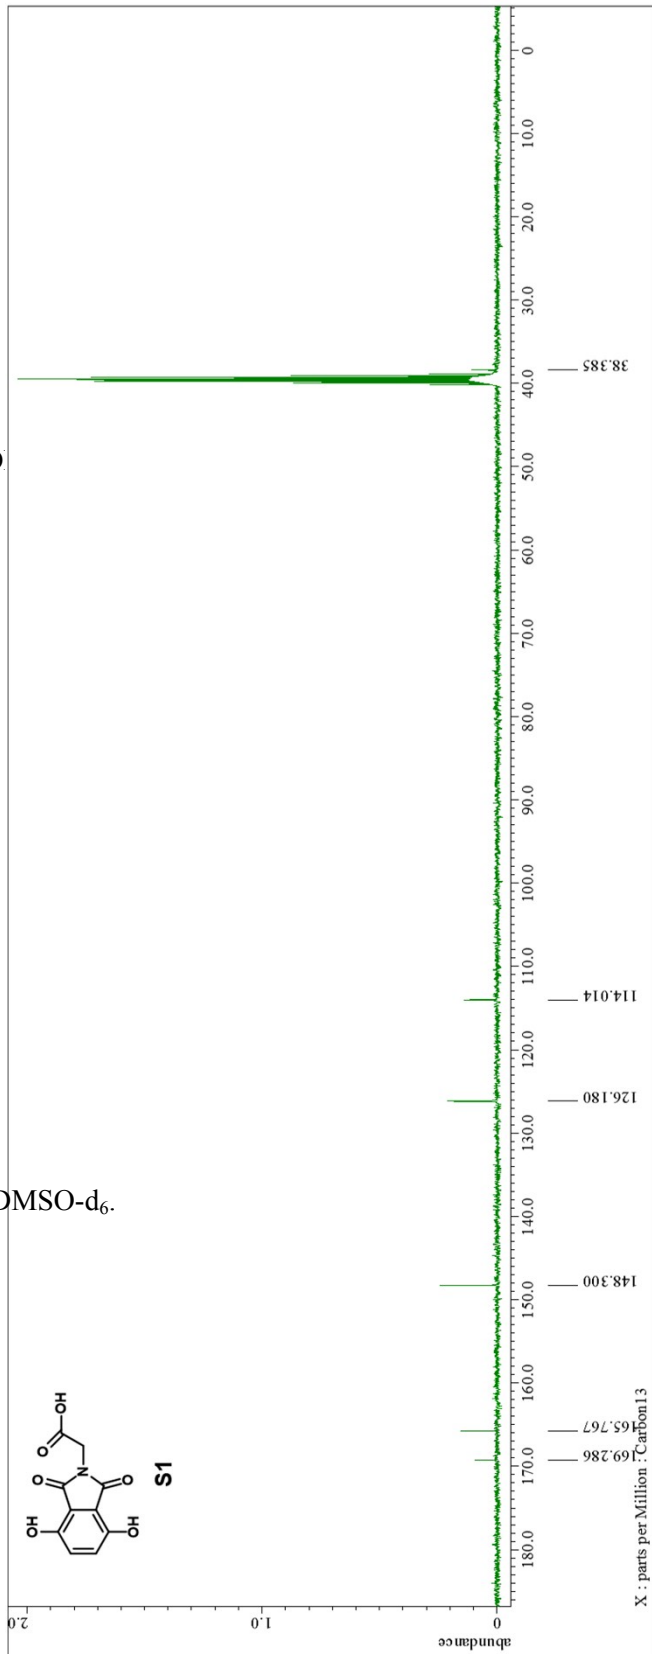

Figure S24. <sup>13</sup>C-NMR spectrum of S1 in DMSO-d<sub>6</sub>.
